# Supplementary material for: Residency Program Directors’ Views on Research Conducted During Medical School: A National Survey
Source: PubMed Central journal article supplement — Acad Med. 2023 Apr 21;98(10):1185–95. doi: 10.1097/ACM.0000000000005256 (PMC10516175; doi:10.1097/acm.0000000000005256), 2023-04-21
Supplement: acm-98-1185-s001.pdf [file acm-98-1185-s001.pdf]

## **Table of Contents**

|                                                                                                                                                                                                                               |           |
|-------------------------------------------------------------------------------------------------------------------------------------------------------------------------------------------------------------------------------|-----------|
| <b>Supplemental Digital Appendix 1: Residency Program Directors Survey .....</b>                                                                                                                                              | <b>1</b>  |
| <b>Supplemental Digital Appendix 2: Differences in Value of Types of Research by Specialty Competitiveness Category and by Program Setting .....</b>                                                                          | <b>31</b> |
| <b>Supplemental Digital Appendix 3: Odds That PDs From Competitive or Most Competitive Specialties Expect Increased Productivity From a Certain Type of Research, Compared to PDs From Least Competitive Specialties.....</b> | <b>32</b> |
| <b>Supplemental Digital Appendix 4: Meaningful Research Participation Is a Proxy for Other Applicant Traits.....</b>                                                                                                          | <b>33</b> |

# Residency Program Directors Survey

---

Start of Block: Welcome!

Q1 Medical students are often concerned about **how their research efforts during medical school are perceived by Program Directors during the residency application process**. We have found these concerns to be heightened as USMLE Step 1 transitions to pass/fail. **Thank you for completing this survey** so that we may better understand how Program Directors evaluate student participation in research. The survey is short and **should take less than 10 minutes to complete**. All responses are confidential. This survey has received exempt determination from the University of Chicago IRB.

End of Block: Welcome!

---

Start of Block: Demographics (Section 1/5)

**Q2 Section 1 of 5: Residency Program Characteristics**

---

**Q3 Your residency program is best described as:**

- Academic Medical Center or University-affiliated (1)
  - Community Hospital (2)
  - Military (3)
  - Other, please describe (4) \_\_\_\_\_
-

**Q4 In what region of the country is your program located?**

- Pacific (CA, OR, WA, AK, HI) (1)
- Mountain (AZ, CO, ID, MT, NM, NV, UT, WY) (2)
- West North Central (IA, KS, MN, MO, ND, NE, SD) (3)
- West South Central (AR, LA, OK, TX) (4)
- East North Central (IL, IN, MI, OH, WI) (5)
- East South Central (AL, KY, MS, TN) (6)
- New England (CT, MA, ME, NH, RI, VT) (7)
- Middle Atlantic (NJ, NY, PA) (8)
- South Atlantic (DC, DE, FL, GA, MD, NC, SC, VA, WV) (9)
- Puerto Rico (10)

---

**Q5 For which specialty are you a Residency Program Director?**

▼ Anesthesiology (1) ... Other (31)

---

*Display This Question:*

*If For which specialty are you a Residency Program Director? = Other*

**Q6 If Other, please specify:**

---

End of Block: Demographics (Section 1/5)

---

Start of Block: Research/Scholarly Work During Medical School

**Q7 Section 2 of 5: Research/Scholarly Work During Medical School**

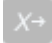

**Q8 When reviewing a student's application for residency, of how much importance is participation in research/scholarly work during medical school?**

- High importance (4)
- Moderate importance (3)
- Low importance (2)
- Not considered (1)

*Skip To: End of Block If When reviewing a student's application for residency, of how much importance is participation in... = Not considered*

---

Page Break

---

Display This Question:

If When reviewing a student's application for residency, of how much importance is participation in...  
= High importance

Or When reviewing a student's application for residency, of how much importance is participation in...  
= Moderate importance

Or When reviewing a student's application for residency, of how much importance is participation in...  
= Low importance

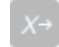

**Q9 Is completion of a research project *alone* (excluding case reports or literature reviews) a sufficient indicator of meaningful participation in research, or is presentation/publication of results required?**

- Project completion is not required (1)
- Project completion alone is sufficient (2)
- Presentation/publication of results is needed (3)

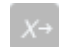

**Q10 How important is it that residency applicants completed scholarly work in your residency specialty, compared to work done in a different clinical specialty?**

- High importance that research was done in my specialty (4)
- Moderate importance that research was done in my specialty (3)
- Low importance that research was done in my specialty (2)
- Not important whether research was done in my specialty (1)

Display This Question:

If Device Type Is Not Mobile

**Q11\_A How important is each of the following in assessing whether an applicant has meaningfully participated in research during medical school?**

|                                                                                                                                  | Not considered<br>(1) | Low importance<br>(2) | Moderate<br>importance (3) | High importance<br>(4) |
|----------------------------------------------------------------------------------------------------------------------------------|-----------------------|-----------------------|----------------------------|------------------------|
| Completion of an original research project (excluding case reports and literature reviews) (Q11A_1)                              | <input type="radio"/> | <input type="radio"/> | <input type="radio"/>      | <input type="radio"/>  |
| Acceptance of an abstract of poster to a regional or national meeting (may not have actually presented due to pandemic) (Q11A_2) | <input type="radio"/> | <input type="radio"/> | <input type="radio"/>      | <input type="radio"/>  |
| Submission of a manuscript for publication (Q11A_3)                                                                              | <input type="radio"/> | <input type="radio"/> | <input type="radio"/>      | <input type="radio"/>  |
| One publication (Q11A_4)                                                                                                         | <input type="radio"/> | <input type="radio"/> | <input type="radio"/>      | <input type="radio"/>  |
| More than one publication (Q11A_5)                                                                                               | <input type="radio"/> | <input type="radio"/> | <input type="radio"/>      | <input type="radio"/>  |
| First author publication (Q11A_6)                                                                                                | <input type="radio"/> | <input type="radio"/> | <input type="radio"/>      | <input type="radio"/>  |
| Publication in a high impact journal (Q11A_7)                                                                                    | <input type="radio"/> | <input type="radio"/> | <input type="radio"/>      | <input type="radio"/>  |

-----

Display This Question:  
If Device Type Is Mobile

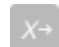

**Q11\_B How important is each of the following in assessing whether an applicant has meaningfully participated in research during medical school?**

|                                                                                                                                  | High Importance<br>(4) | Moderate<br>Importance (3) | Low importance<br>(2) | Not considered<br>(1) |
|----------------------------------------------------------------------------------------------------------------------------------|------------------------|----------------------------|-----------------------|-----------------------|
| Completion of an original research project (excluding case reports and literature reviews) (Q11B_1)                              | <input type="radio"/>  | <input type="radio"/>      | <input type="radio"/> | <input type="radio"/> |
| Acceptance of an abstract of poster to a regional or national meeting (may not have actually presented due to pandemic) (Q11B_2) | <input type="radio"/>  | <input type="radio"/>      | <input type="radio"/> | <input type="radio"/> |
| Submission of a manuscript for publication (Q11B_3)                                                                              | <input type="radio"/>  | <input type="radio"/>      | <input type="radio"/> | <input type="radio"/> |
| One publication (Q11B_4)                                                                                                         | <input type="radio"/>  | <input type="radio"/>      | <input type="radio"/> | <input type="radio"/> |
| More than one publication (Q11B_5)                                                                                               | <input type="radio"/>  | <input type="radio"/>      | <input type="radio"/> | <input type="radio"/> |
| First author publication (Q11B_6)                                                                                                | <input type="radio"/>  | <input type="radio"/>      | <input type="radio"/> | <input type="radio"/> |
| Publication in a high impact journal (Q11B_7)                                                                                    | <input type="radio"/>  | <input type="radio"/>      | <input type="radio"/> | <input type="radio"/> |

-----  
Page Break

---



**Q12 Students conduct many different types of research, including Basic Science, Translational Research, Clinical Research, Social Science, Ethics, Public/Community Health, Global Health, Medical Education, Medical Humanities, Quality Improvement, Health Systems Science, Business of Medicine, and others.**

**In your residency applicant review process, do you value applicant research of all types equally, or do you value some types more than others?**

- I value all types of research equally (1)
- I value some types of research more than others (2)

---

*Display This Question:*

*If Students conduct many different types of research, including Basic Science, Translational Research, = I value some types of research more than others*

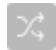

**Q13 Please indicate which *types of research are valued highly* when you rate residency applicants. Select all highly valued types.**

- Basic science (1)
  - Translational research (2)
  - Clinical research (3)
  - Social science (4)
  - Ethics (5)
  - Medical education (6)
  - Medical humanities (7)
  - Public/community health (8)
  - Global health (9)
  - Quality improvement (10)
  - Health systems science (11)
  - Business of medicine (12)
  - Other, please specify (13)
- 
- Other, please specify (14)
-

Page Break

---

**Q14 Do you weigh *measures of research productivity* (e.g. publication, poster presentation, etc) differently based on the *type* of research (e.g. basic science, clinical research, quality improvement, etc)?**

- Yes, I weigh measures of research productivity differently based on the type of research (1)
- No, I weigh measures of research productivity the same regardless of the type of research (2)

---

*Display This Question:*

*If Do you weigh measures of research productivity (e.g. publication, poster presentation, etc) diffe... = Yes, I weigh measures of research productivity differently based on the type of research*

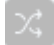

**Q15 From which *types* of research do you expect *more research productivity* during medical school?**

- Basic science (1)
  - Translational research (2)
  - Clinical research (3)
  - Social science (4)
  - Ethics (5)
  - Medical education (6)
  - Medical humanities (7)
  - Public/community health (8)
  - Global health (9)
  - Quality improvement (10)
  - Health systems science (11)
  - Business of medicine (12)
  - Other, please specify (13)
- 
- Other, please specify (14)
-

Page Break

---

*Display This Question:*

*If Students conduct many different types of research, including Basic Science, Translational Research, = I value some types of research more than others*

*Or Do you weigh measures of research productivity (e.g. publication, poster presentation, etc) differently based on the type of research  
= Yes, I weigh measures of research productivity differently based on the type of research*

Q16

**It is often easier to compare research productivity between students doing the same type of research. This may become more complex when students conduct different types of work.**

**How do you weigh less productive work of a highly valued type, compared to more productivity of a lesser valued type of research?**

- High-value type of research weighs much more than productivity (1)
- High-value type of research weighs somewhat more than productivity (2)
- Both weigh about the same (3)
- High research productivity weighs somewhat more than high value type of research (4)
- High research productivity weighs much more than high value type of research (5)

---

*Display This Question:*

*If Students conduct many different types of research, including Basic Science, Translational Research, = I value all types of research equally*

*And If*

*It is often easier to compare research productivity between students doing the same type of research...  
!= Both weigh about the same*

*Or It is often easier to compare research productivity between students doing the same type of research... = High research productivity weighs somewhat more than high value type of research*

*Or It is often easier to compare research productivity between students doing the same type of research... = High research productivity weighs much more than high value type of research*

**Q17 Please indicate which *types of research are valued highly* when you rate residency applicants. Select all highly valued types.**

- Basic science (1)
  - Translational research (2)
  - Clinical research (3)
  - Social science (4)
  - Ethics (5)
  - Medical education (6)
  - Medical humanities (7)
  - Public/community health (8)
  - Global health (9)
  - Quality improvement (10)
  - Health systems science (11)
  - Business of medicine (12)
  - Other, please specify (13)
- 
- Other, please specify (14)
-



Page Break

---

**Q18 Do you adjust your expectations for research productivity if medical school students...**

|                                                                         | Yes, I expect a lot more of such students (1) | Yes, I expect somewhat more of such students (2) | No, I do not adjust my expectations (3) |
|-------------------------------------------------------------------------|-----------------------------------------------|--------------------------------------------------|-----------------------------------------|
| ...complete a PhD along with their MD? (1)                              | <input type="radio"/>                         | <input type="radio"/>                            | <input type="radio"/>                   |
| ...add a 5th year to their medical education dedicated to research? (2) | <input type="radio"/>                         | <input type="radio"/>                            | <input type="radio"/>                   |

Page Break

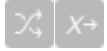

**Q19 Please consider achievements that you indicated were of high or moderate importance in defining meaningful participation in research above. As a reminder, you selected the following:**

**High importance:  $\{Q11\_A/ChoiceGroup/SelectedChoicesForAnswer/1\}$**

**Moderate importance:**

**$\{Q11\_A/ChoiceGroup/SelectedChoicesForAnswer/2\}$  When you assess residency applicants, do you use meaningful participation in research as a proxy for the following traits? Check all that apply:**

- Commitment to the residency specialty (1)
- Communication skills (2)
- Critical and analytic thinking skills (3)
- Intellectual curiosity (4)
- Interest in an academic career (5)
- Likelihood of research success during residency (6)
- Perseverance (7)
- Self-directed learning skills (8)
- Teamwork skills (9)
- Time management skills (10)
- Other, please specify (11)

---
- Other, please specify (12)

---

Page Break

---

**Q20 Section 3 of 5: Using Residency Application Components to Determine which Students to Interview**

---

Q21

**Again, consider achievements that you indicated were of high or moderate importance in defining meaningful participation in research.**

**In the absence of a numeric USMLE Step 1 score, how will you weigh meaningful participation in research relative to the following 8 application components as you decide which applicants to invite to interview?**

---

**Q22 To garner an invitation to interview, it is more important for an applicant to have:**

- A high USMLE Step 2 score (1)
  - Meaningful participation in research (2)
  - Both are equally valuable toward an invitation to interview (3)
- 

**Q23 To garner an invitation to interview, it is more important for an applicant to have:**

- High clerkship grades (1)
  - Meaningful participation in research (2)
  - Both are equally valuable toward an invitation to interview (3)
-

**Q24 To garner an invitation to interview, it is more important for an applicant to have:**

- Excellent performance in electives in your specialty (1)
  - Meaningful participation in research (2)
  - Both are equally valuable toward an invitation to interview (3)
- 

**Q25 To garner an invitation to interview, it is more important for an applicant to have:**

- Strong letters of recommendation (1)
  - Meaningful participation in research (2)
  - Both are equally valuable toward an invitation to interview (3)
- 

**Q26 To garner an invitation to interview, it is more important for an applicant to have:**

- Demonstrated leadership during medical school (1)
  - Meaningful participation in research (2)
  - Both are equally valuable toward an invitation to interview (3)
- 

**Q27 To garner an invitation to interview, it is more important for an applicant to have:**

- Service work during medical school (1)
  - Meaningful participation in research (2)
  - Both are equally valuable toward an invitation to interview (3)
-

**Q28 To garner an invitation to interview, it is more important for an applicant to have:**

- Election to AOA or similar honor society (if available at the applicant's school) (1)
- Meaningful participation in research (2)
- Both are equally valuable toward an invitation to interview (3)

---

Page Break



**Q29 In the absence of a numeric USMLE Step 1 score, will meaningful participation in research have increased weight as you evaluate which applicants to invite to interview?**

- Yes, with Step 1 being Pass/Fail, meaningful participation in research will be more important (1)
- No, the weight of meaningful participation in research will not change (2)

---

Page Break

**Q30 Section 4 of 5: Using Residency Application Components to Determine Rank List Order**

---

**Q31 Again, consider your definition of *meaningful participation in research*. In the absence of a numeric USMLE Step 1 score, how will you weigh meaningful participation in research relative to the following 8 application components as you decide how to position applicants on your rank list?**

---

**Q32 For a higher rank on the Match list, it is more important for the applicant to have:**

- A high USMLE Step 2 score (1)
  - Meaningful participation in research (2)
  - Both are equally valuable toward higher rank on the Match list (3)
- 

**Q33 For a higher rank on the Match list, it is more important for the applicant to have:**

- High clerkship grades (1)
  - Meaningful participation in research (2)
  - Both are equally valuable toward higher rank on the Match list (3)
- 

**Q34 For a higher rank on the Match list, it is more important for the applicant to have:**

- Excellent performance in electives in your specialty (1)
  - Meaningful participation in research (2)
  - Both are equally valuable toward higher rank on the Match list (3)
-

**Q35 For a higher rank on the Match list, it is more important for the applicant to have:**

- Strong letters of recommendation (1)
  - Meaningful participation in research (2)
  - Both are equally valuable toward higher rank on the Match list (3)
- 

**Q36 For a higher rank on the Match list, it is more important for the applicant to have:**

- Demonstrated leadership during medical school (1)
  - Meaningful participation in research (2)
  - Both are equally valuable toward higher rank on the Match list (3)
- 

**Q37 For a higher rank on the Match list, it is more important for the applicant to have:**

- Service work during medical school (1)
  - Meaningful participation in research (2)
  - Both are equally valuable toward higher rank on the Match list (3)
- 

**Q38 For a higher rank on the Match list, it is more important for the applicant to have:**

- Election to AOA or similar honor society (if available at the applicant's school) (1)
  - Meaningful participation in research (2)
  - Both are equally valuable toward higher rank on the Match list (3)
- 

Page Break

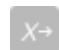

**Q39 How important to ranking is an applicant's ability to clearly discuss their research/scholarly work during their interview?**

- High importance (4)
  - Moderate importance (3)
  - Low importance (2)
  - Not considered (1)
- 

**Q40 In the absence of a numeric USMLE Step 1 score, will meaningful participation in research have increased weight as you consider which applicants to rank highly on your Match list?**

- Yes, with Step 1 being Pass/Fail, meaningful participation in research will be more important (1)
- No, the weight of meaningful participation in research will not change (2)

**End of Block: Research/Scholarly Work During Medical School**

---

**Start of Block: About Your Residency Program**

**Q41 Section 5 of 5: About your Residency Program**

---

**Q42 Upon completion of their training, approximately what percent of your residency program graduates pursue careers in academic medicine?**

- 0-25% (1)
  - 26-50% (2)
  - 51-75% (3)
  - 76-100% (4)
- 

**Q43 Upon completion of their training, approximately what percent of your residency program graduates pursue research as part of their career?**

- 0-25% (1)
  - 26-50% (2)
  - 51-75% (3)
  - 76-100% (4)
- 

**Q44 For your residency program, is sending graduates into academic careers...**

- A central goal (1)
  - One goal among others (2)
  - Not a goal (3)
-

**Q45 For your residency program, is training physician-scientists (or clinician-scientists)...**

- A central goal (1)
  - One goal among others (2)
  - Not a goal (3)
- 

**Q46 Does your residency program have a research requirement?**

- Yes (1)
  - No (2)
- 

*Display This Question:*

*If Does your residency program have a research requirement? = No*

**Q47 In your residency program, is participation by residents in a hypothesis-driven research project...**

- optional, but strongly encouraged (1)
  - optional, and not emphasized (2)
- 

**Q48 Is there anything else that you would like to tell us about the role of medical school research experience in how likely prospective residents are to be invited to interview or in how those interviewed are ranked?**

---

**End of Block: About Your Residency Program**

---

**Start of Block: Block 6**

**Q49 Thank you so much for your input! Please click the forward arrow to submit your survey.**

End of Block: Block 6

---

## Supplemental Digital Appendix 2

### Differences in Value of Types of Research by Specialty Competitiveness Category and by Program Setting

|                         | Overall<br>N=251 | Least<br>Competitive<br>N=96 | Competitive<br>N=74                  | Most<br>Competitive<br>N=81      | Academic<br>N=183 | Community<br>N=65                    | Military<br>N=3 |
|-------------------------|------------------|------------------------------|--------------------------------------|----------------------------------|-------------------|--------------------------------------|-----------------|
| Clinical research       | 210 (83.7%)      | 73 (76.0%)                   | 64 (86.5%)                           | <b>73 (90.1%)</b> <sup>^</sup>   | 162 (88.5%)       | <b>46<br/>(70.8%)</b> <sup>***</sup> | 2 (66.7%)       |
| Quality improvement     | 156 (62.2%)      | 76 (79.2%)                   | <b>40<br/>(54.1%)</b> <sup>***</sup> | <b>40 (49.4%)</b> <sup>+++</sup> | 109 (59.6%)       | 44 (67.7%)                           | 3 (100%)        |
| Medical education       | 129 (51.4%)      | 52 (54.2%)                   | 45 (60.8%)                           | 32 (39.5%)                       | 90 (49.2%)        | 37 (56.9%)                           | 2 (66.7%)       |
| Translational science   | 126 (50.2%)      | 42 (43.8%)                   | 32 (43.2%)                           | <b>52 (64.2%)</b> <sup>**</sup>  | 103 (56.3%)       | <b>22 (33.9%)</b> <sup>^^</sup>      | 1 (33.3%)       |
| Public/community health | 125 (49.8%)      | 63 (65.6%)                   | 42 (56.8%)                           | <b>20 (24.7%)</b> <sup>+++</sup> | 80 (43.7%)        | <b>42 (64.6%)</b> <sup>++</sup>      | 3 (100%)        |
| Basic science           | 91 (36.3%)       | 22 (22.9%)                   | 21 (28.4%)                           | <b>48 (59.3%)</b> <sup>+++</sup> | 79 (43.2%)        | <b>11<br/>(16.9%)</b> <sup>+++</sup> | 1 (33.3%)       |
| Global health           | 75 (29.9%)       | 37 (38.5%)                   | 19 (25.7%)                           | <b>19 (23.5%)</b> <sup>+</sup>   | 59 (32.2%)        | 14 (21.5%)                           | 2 (66.7%)       |
| Ethics                  | 62 (24.7%)       | 27 (28.1%)                   | 19 (25.7%)                           | 16 (19.8%)                       | 45 (24.6%)        | 16 (24.6%)                           | 1 (33.3%)       |
| Health systems science  | 52 (20.7%)       | 26 (27.1%)                   | 16 (21.6%)                           | <b>10 (12.4%)</b> <sup>^</sup>   | 38 (20.8%)        | 13 (20%)                             | 1 (33.3%)       |
| Medical humanities      | 49 (19.5%)       | 21 (21.9%)                   | 20 (27.0%)                           | <b>8 (9.9%)</b> <sup>*</sup>     | 34 (18.6%)        | 14 (21.5%)                           | 1 (33.3%)       |
| Social science          | 49 (19.5%)       | 21 (21.9%)                   | 15 (20.3%)                           | 13 (16.1%)                       | 35 (19.1%)        | 12 (18.5%)                           | 2 (66.7%)       |
| Business of medicine    | 25 (10.0%)       | 12 (12.5%)                   | 5 (6.8%)                             | 8 (9.9%)                         | 17 (9.3%)         | 7 (10.8%)                            | 1 (33.3%)       |

Among PDs who value some types of research more than others (n=251), there are differences among PDs from competitive and most competitive categorized specialties, compared to least competitive categorized specialties, and also among PDs from community-based programs, compared to academic medical center/university-affiliated programs. (\* p=0.04, + p=0.03, ^ p=0.02, \*\* p=0.007, ++ p=0.004, ^^ p=0.002, \*\*\* p=0.001, +++ p<0.001).



### Supplemental Digital Appendix 3

#### Odds That PDs From Competitive or Most Competitive Specialties Expect Increased Productivity From a Certain Type of Research, Compared to PDs From Least Competitive Specialties

|                         | High value type (Table 2) (N=251) N (%) | Higher productivity expected (N=309) N (%) | Competitive specialties ( <i>unadjusted</i> ) |           |         | Competitive specialties ( <i>adjusted</i> ) |           |         | Most competitive specialties ( <i>unadjusted</i> ) |                  |             | Most competitive specialties ( <i>adjusted</i> ) |                  |              |
|-------------------------|-----------------------------------------|--------------------------------------------|-----------------------------------------------|-----------|---------|---------------------------------------------|-----------|---------|----------------------------------------------------|------------------|-------------|--------------------------------------------------|------------------|--------------|
|                         |                                         |                                            | OR                                            | 95% CI    | p-value | OR                                          | 95% CI    | p-value | OR                                                 | 95% CI           | p-value     | OR                                               | 95% CI           | p-value      |
| Clinical research       | 210 (83.7)                              | 206 (66.7)                                 | 0.96                                          | 0.52-1.75 | 0.887   | 0.77                                        | 0.41-1.47 | 0.43    | <b>1.84</b>                                        | <b>1.04-3.25</b> | <b>0.04</b> | 1.26                                             | 0.68-2.35        | 0.46         |
| Quality improvement     | 156 (62.2)                              | 119 (38.5)                                 | 0.75                                          | 0.41-1.38 | 0.35    | 0.80                                        | 0.43-1.50 | 0.49    | 0.77                                               | 0.45-1.33        | 0.35        | 0.85                                             | 0.48-1.52        | 0.59         |
| Medical education       | 129 (51.4)                              | 95 (30.7)                                  | 0.69                                          | 0.37-1.29 | 0.24    | 0.69                                        | 0.36-1.30 | 0.25    | <b>0.48</b>                                        | <b>0.27-0.85</b> | <b>0.01</b> | <b>0.42</b>                                      | <b>0.23-0.79</b> | <b>0.007</b> |
| Translational science   | 126 (50.2)                              | 74 (24.0)                                  | 0.78                                          | 0.38-1.60 | 0.50    | 0.75                                        | 0.36-1.55 | 0.43    | 1.05                                               | 0.57-1.93        | 0.89        | 0.91                                             | 0.47-1.75        | 0.77         |
| Public/community health | 125 (49.8)                              | 83 (26.9)                                  | 0.66                                          | 0.34-1.25 | 0.20    | 0.77                                        | 0.39-1.50 | 0.44    | <b>0.48</b>                                        | <b>0.27-0.88</b> | <b>0.02</b> | 0.54                                             | 0.28-1.02        | 0.06         |
| Basic science           | 91 (36.3)                               | 72 (23.3)                                  | 1.41                                          | 0.69-2.88 | 0.34    | 1.55                                        | 0.74-3.24 | 0.24    | 1.38                                               | 0.72-2.63        | 0.34        | 1.49                                             | 0.74-3.00        | 0.26         |
| Global health           | 75 (29.9)                               | 37 (12.0)                                  | 0.60                                          | 0.24-1.52 | 0.28    | 0.58                                        | 0.22-1.48 | 0.25    | 0.72                                               | 0.33-1.57        | 0.41        | 0.65                                             | 0.28-1.50        | 0.31         |
| Ethics                  | 62 (24.7)                               | 32 (10.4)                                  | 0.58                                          | 0.20-1.65 | 0.31    | 0.53                                        | 0.18-1.53 | 0.24    | 0.95                                               | 0.41-2.17        | 0.90        | 0.75                                             | 0.31-1.82        | 0.53         |
| Health systems science  | 52 (20.7)                               | 36 (11.7)                                  | 0.48                                          | 0.18-1.24 | 0.13    | 0.47                                        | 0.18-1.22 | 0.12    | 0.61                                               | 0.28-1.34        | 0.22        | 0.57                                             | 0.24-1.32        | 0.19         |
| Medical humanities      | 49 (19.5)                               | 46 (14.9)                                  | 0.81                                          | 0.36-1.84 | 0.62    | 0.81                                        | 0.35-1.86 | 0.62    | 0.75                                               | 0.36-1.57        | 0.45        | 0.80                                             | 0.36-1.74        | 0.57         |
| Social science          | 49 (19.5)                               | 33 (10.7)                                  | 0.86                                          | 0.37-2.02 | 0.73    | 0.84                                        | 0.35-2.02 | 0.70    | <b>0.36</b>                                        | <b>0.14-0.90</b> | <b>0.03</b> | <b>0.28</b>                                      | <b>0.11-0.75</b> | <b>0.01</b>  |
| Business of medicine    | 25 (10.0)                               | 22 (7.1)                                   | 0.35                                          | 0.09-1.34 | 0.13    | 0.31                                        | 0.08-1.21 | 0.09    | 0.76                                               | 0.30-1.95        | 0.57        | 0.53                                             | 0.19-1.46        | 0.22         |

Both unadjusted model, and model adjusted for program setting (academic/university, community-based, military), importance of research in evaluating residency applicants, and whether sending graduates into physician-scientist careers is a program goal. N=309.

## Supplemental Digital Appendix 4

### Meaningful Research Participation Is a Proxy for Other Applicant Traits

|                                                 | Overall<br>N=875 | Least<br>Competitive<br>N=294 | Competitive<br>N=286              | Most<br>Competitive<br>N=305        | Academic<br>N=663 | Community<br>N=208                 | Military<br>N=14 |
|-------------------------------------------------|------------------|-------------------------------|-----------------------------------|-------------------------------------|-------------------|------------------------------------|------------------|
| Intellectual curiosity                          | 545<br>(62.3%)   | 176 (59.9%)                   | 182<br>(63.6%)                    | 187 (61.3%)                         | 417 (62.9%)       | 119 (57.2%)                        | 9 (64.3%)        |
| Critical and analytic thinking skills           | 482<br>(55.1%)   | 164 (55.8%)                   | 151<br>(52.8%)                    | 167 (54.8%)                         | 371 (56%)         | 101 (48.6%)                        | 10 (71.4%)       |
| Self-directed learning skills                   | 455<br>(52.0%)   | 138 (46.9%)                   | 152<br>(53.2%)                    | 165 (54.1%)                         | 346 (52.2%)       | 102 (49%)                          | 7 (50%)          |
| Perseverance                                    | 427<br>(48.8%)   | 141 (48%)                     | 131<br>(45.8%)                    | 155 (50.8%)                         | 337 (50.8%)       | <b>80 (38.5%)<sup>^</sup></b>      | 10 (71.4%)       |
| Interest in an academic career                  | 413<br>(47.2%)   | 141 (48%)                     | 155<br>(54.2%)                    | <b>117<br/>(38.4%)<sup>**</sup></b> | 328 (49.5%)       | <b>81<br/>(38.9%)<sup>++</sup></b> | 4 (28.6%)        |
| Likelihood of research success during residency | 409<br>(46.7%)   | 128 (43.5%)                   | 130<br>(45.5%)                    | 151 (49.5%)                         | 314 (47.4%)       | 89 (42.8%)                         | 6 (42.9%)        |
| Time management skills                          | 382<br>(43.7%)   | 119 (40.5%)                   | 116<br>(40.6%)                    | 147 (48.2%)                         | 295 (44.5%)       | 79 (38%)                           | 8 (57.1%)        |
| Teamwork skills                                 | 266<br>(30.4%)   | 91 (31%)                      | 78 (27.3%)                        | 97 (31.8%)                          | 197 (29.7%)       | 64 (30.8%)                         | 5 (35.7%)        |
| Commitment to residency specialty               | 261<br>(29.8%)   | 73 (24.8%)                    | 80 (28.0%)                        | <b>108<br/>(35.4%)<sup>*</sup></b>  | 211 (31.8%)       | <b>48<br/>(23.1%)<sup>**</sup></b> | 2 (14.3%)        |
| Communication skills                            | 153<br>(17.5%)   | 61 (20.8%)                    | <b>36<br/>(12.6%)<sup>+</sup></b> | 56 (18.4%)                          | 115 (17.3%)       | 36 (17.3%)                         | 2 (14.3%)        |

Frequency at which each trait was identified by all PD (overall) and then by either specialty competitiveness or by setting. (\* p=0.005, + p=0.009, \*\* p=0.02, ^p=0.002, ++ p=0.008).
